# Supplementary material for: Comparison of the Efficacy of Zoledronate and Denosumab in Patients with Acute Osteoporotic Vertebral Compression Fractures: A Randomized Controlled Trial
Source: MDPI journal article supplement (doi:10.3390/jcm13072040), 2024-04-01
Supplement: s1 [file s1]

Table S1. List of serious adverse events.

| Group       | Serious adverse event                                        | Reason                                               | Decision                              |
|-------------|--------------------------------------------------------------|------------------------------------------------------|---------------------------------------|
| Zoledronate | Expired due to cardia arrest                                 | Pre-existed cardiovascular disease                   | No direct correlation with medication |
| Zoledronate | Colon cancer                                                 | Occurrence due to age and baseline risk factor       | No direct correlation with medication |
| Zoledronate | Non-small cell lung cancer                                   | Occurrence due to age                                | No direct correlation with medication |
| Zoledronate | Klatskin tumor                                               | Occurrence due to age and family history             | No direct correlation with medication |
| Denosumab   | Expired due to complication of acute intracranial hemorrhage | Occurrence due to baseline risk factor               | No direct correlation with medication |
| Denosumab   | Expired due to complication of liver cirrhosis               | Pre-existed liver cirrhosis                          | No direct correlation with medication |
| Denosumab   | Multiple myeloma                                             | Misdiagnosed as an osteoporotic compression fracture | No direct correlation with medication |
| Denosumab   | Prostate cancer                                              | Occurrence due to age and baseline risk factor       | No direct correlation with medication |
| Denosumab   | Pancreatic cancer                                            | Occurrence due to age and baseline risk factor       | No direct correlation with medication |
